# Supplementary material
Source: PubMed Central journal article supplement (PMC2224184)

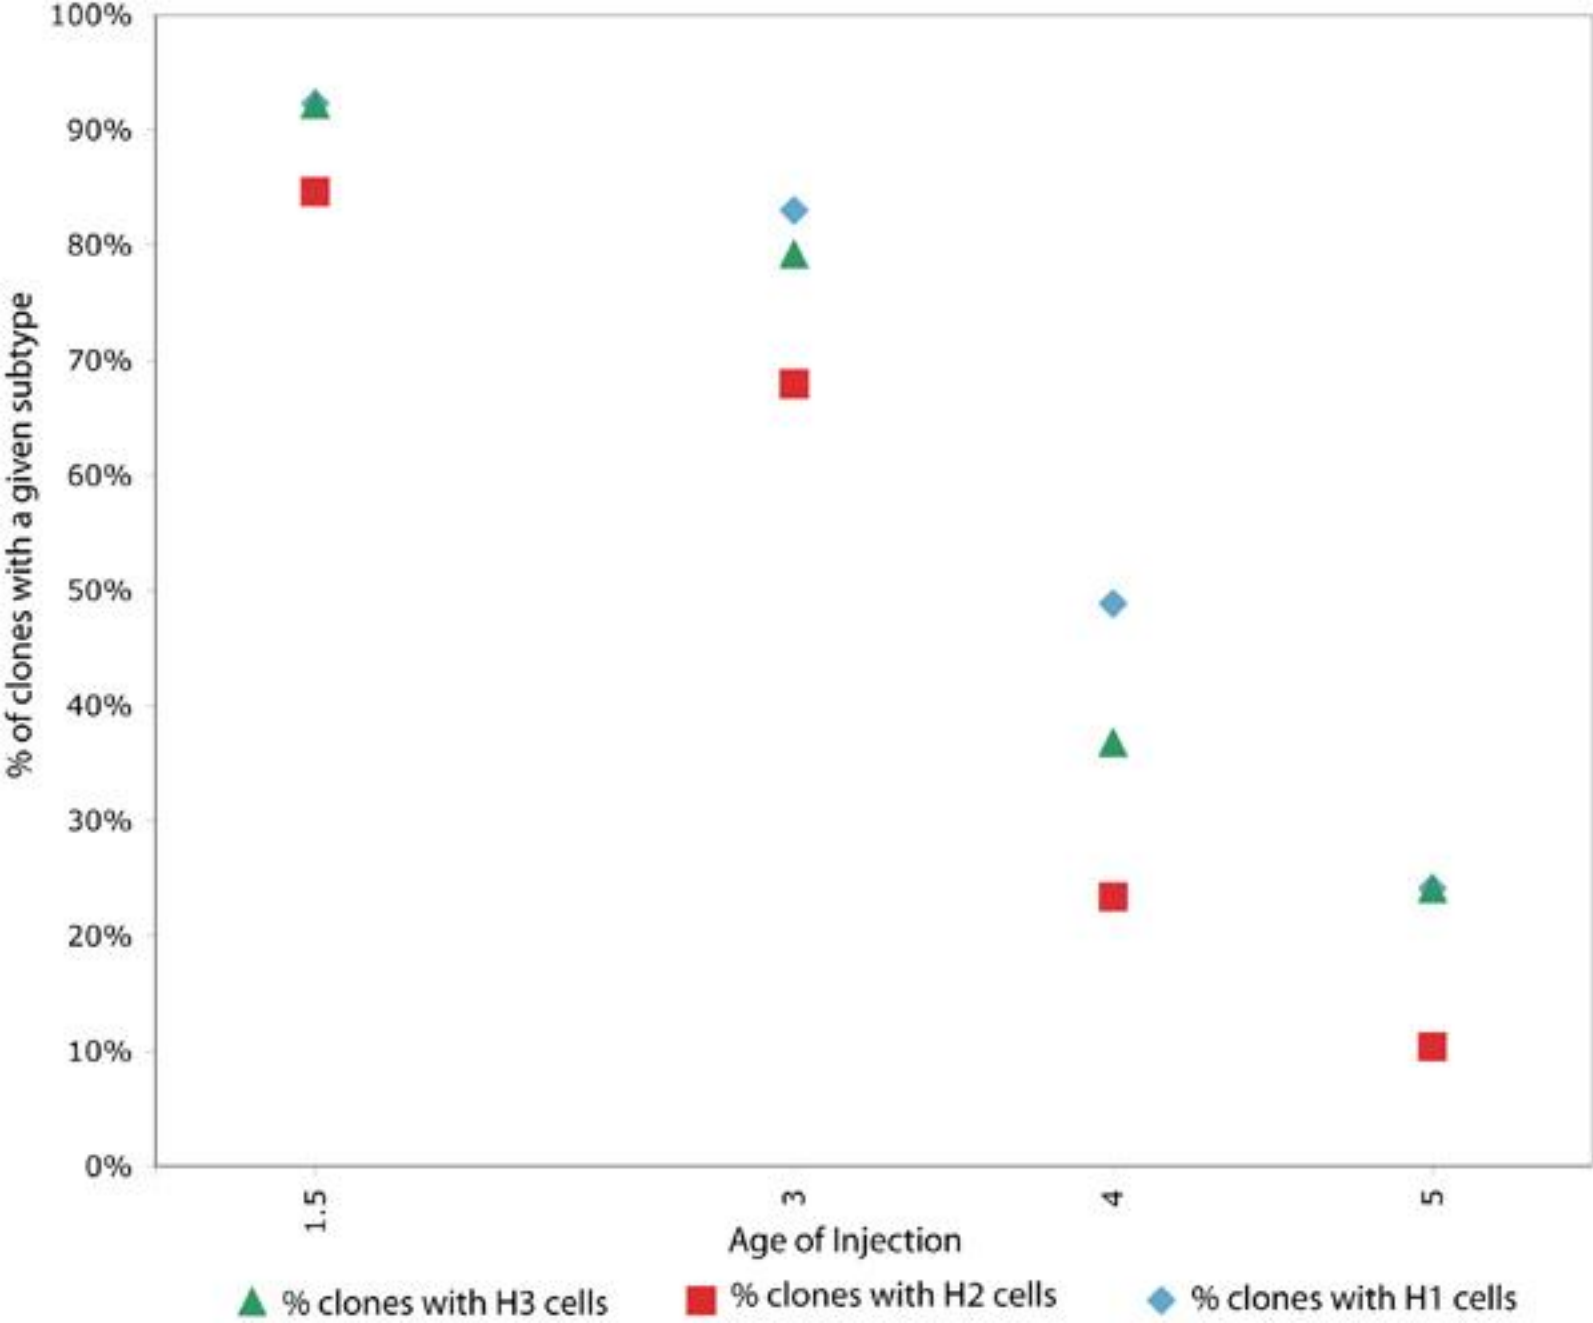

Supplement: pnas_0709979104_1.pdf [file pnas_0709979104_1.pdf]
